# Supplementary material for: The Culturable Mycobiota of Sediments and Associated Microplastics: From a Harbor to a Marine Protected Area, a Comparative Study
Source: MDPI journal article supplement (doi:10.3390/jof8090927), 2022-08-31
Supplement: s1 [file s1]

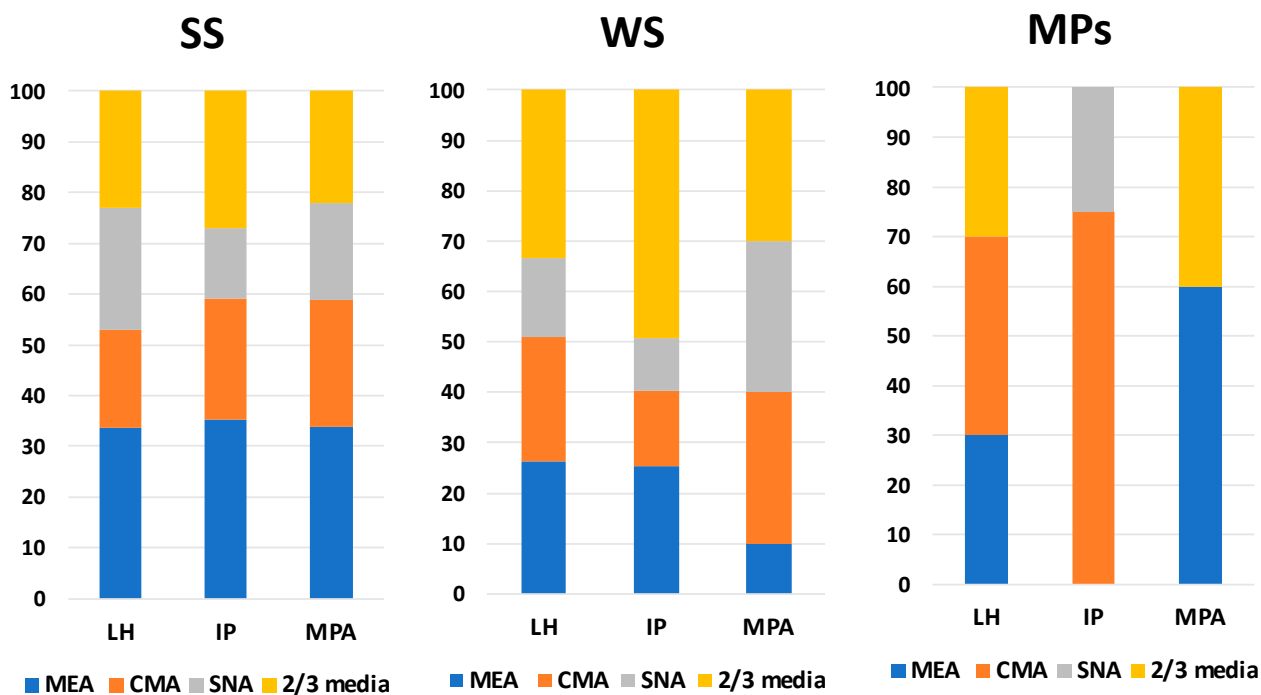

**Figure S1** Growth media taxa yield for solid sediments (SS), watery sediments (WS) and sonication of microplastics (MPs) at three different sites: Livorno Harbour (LH), Intermediate point (IP) and Marine Protected Area (MPA), respectively.
