# Supplementary material for: The Culturable Mycobiota of Sediments and Associated Microplastics: From a Harbor to a Marine Protected Area, a Comparative Study
Source: MDPI journal article supplement (doi:10.3390/jof8090927), 2022-08-31
Supplement: s1 [file s1]

**Table S4.** Concentration (items/kg) of microplastics in relation to their shape (A) and colors (B).

A)

|            | <b>Filament</b> | <b>Fragment</b> | <b>Film</b> | <b>Styrofoam</b> |
|------------|-----------------|-----------------|-------------|------------------|
| <b>LH</b>  | 26.3±10.6       | 2.3±3.2         | 1.0±1.7     | 0                |
| <b>IP</b>  | 33.3±4.0        | 2.0±1.7         | 0.3±0.6     | 0.3±0.6          |
| <b>MPA</b> | 31.0±11.0       | 0.7±1.2         | 0.7±1.2     | 0                |

B)

|            | <b>Black</b> | <b>Blue</b> | <b>White Transp.</b> | <b>White Opaque</b> | <b>Red</b> | <b>Green</b> | <b>Other</b> |
|------------|--------------|-------------|----------------------|---------------------|------------|--------------|--------------|
| <b>LH</b>  | 6.3±6.0      | 7.7±1.5     | 5.3±5.9              | 3.7±6.4             | 0.7±1.2    | 1.0±1.0      | 1.3±1.5      |
| <b>IP</b>  | 5.3±5.0      | 11.3±3.5    | 11.3±5.0             | 4.0±6.1             | 0.7±1.2    | 3.0±1.0      | 1.3±0.6      |
| <b>MPA</b> | 11.0±5.6     | 11.0±5.3    | 0.7±1.2              | 0.0±0.0             | 3.7±2.5    | 2.7±1.5      | 3.7±2.5      |
