# Supplementary material for: The Culturable Mycobiota of Sediments and Associated Microplastics: From a Harbor to a Marine Protected Area, a Comparative Study
Source: MDPI journal article supplement (doi:10.3390/jof8090927), 2022-08-31
Supplement: s1 [file s1]

**Table S1.** Average particle size of sediments, components in %.

| Sample* | Gravel             | Very coarse sand   | Coarse sand       | Medium sand       | Fine sand grain   | Very fine sand grain | Pelite            |
|---------|--------------------|--------------------|-------------------|-------------------|-------------------|----------------------|-------------------|
|         | 2000 $\mu\text{m}$ | 1000 $\mu\text{m}$ | 500 $\mu\text{m}$ | 250 $\mu\text{m}$ | 125 $\mu\text{m}$ | 63 $\mu\text{m}$     | <63 $\mu\text{m}$ |
| LH      | 3.52               | 1.68               | 1.46              | 2.86              | 25.99             | 33.73                | 30.76             |
| IP      | 1.42               | 1.32               | 2.07              | 15.35             | 58.45             | 20.79                | 0.60              |
| MPA     | 16.52              | 30.02              | 52.04             | 1.34              | 0.06              | 0.02                 | 0.00              |

\* Sample: Livorno harbour (LH), intermediate point (IP) and marine protected area (MPA).
