# Supplementary material for: The Culturable Mycobiota of Sediments and Associated Microplastics: From a Harbor to a Marine Protected Area, a Comparative Study
Source: MDPI journal article supplement (doi:10.3390/jof8090927), 2022-08-31
Supplement: s1 [file s1]

**Table S3.** Organopollutants in sediments of Livorno harbour (LH), intermediate point (IP) and marine protected area (MPA), respectively. (LOQ, limit of quantification; U.O.M = unity of measurement)

| Parameter               | U.O.M. d.w. | LH    | IP    | MPA   |
|-------------------------|-------------|-------|-------|-------|
| IPA tot                 | µg/Kg       | 577.2 | 10.1  | 2.9   |
| Acenaphtene             | µg/Kg       | < LOQ | 1.0   | 0.9   |
| Acenaphthylene          | µg/Kg       | 4.1   | < LOQ | < LOQ |
| Anthracene              | µg/Kg       | 3.9   | < LOQ | < LOQ |
| Benzo[a]anthracene      | µg/Kg       | 40.4  | 0.5   | < LOQ |
| Benzo[a]pyrene          | µg/Kg       | 51.2  | < LOQ | < LOQ |
| Benzo[b]fluoranthene    | µg/Kg       | 120.4 | 1.2   | < LOQ |
| Benzo[ghi]perylene      | µg/Kg       | 53.2  | 0.6   | < LOQ |
| Benzo[k]fluoranthene    | µg/Kg       | 43.4  | 0.5   | < LOQ |
| Chrysene                | µg/Kg       | 45.8  | < LOQ | < LOQ |
| Dibenz[a,h]anthracene   | µg/Kg       | 34.5  | 0.8   | < LOQ |
| Fluoranthene            | µg/Kg       | 55.9  | 0.7   | < LOQ |
| Fluorene                | µg/Kg       | < LOQ | 1.2   | 0.7   |
| Indeno[1,2,3-c,d]pyrene | µg/Kg       | 81.2  | 1.1   | < LOQ |
| Naphthalene             | µg/Kg       | < LOQ | 1.5   | < LOQ |
| Phenanthrene            | µg/Kg       | 4.6   | 1.1   | 1.4   |
| Pyrene                  | µg/Kg       | 38.4  | < LOQ | < LOQ |
| PCB tot                 | µg/Kg       | 19.1  | < LOQ | < LOQ |
| PCB 52                  | µg/Kg       | 2.8   | < LOQ | < LOQ |
| PCB 95                  | µg/Kg       | 1.9   | < LOQ | < LOQ |
| PCB 99                  | µg/Kg       | 1.1   | < LOQ | < LOQ |
| PCB 101                 | µg/Kg       | 1.1   | < LOQ | < LOQ |
| PCB 110                 | µg/Kg       | 2.8   | < LOQ | < LOQ |
| PCB 123                 | µg/Kg       | 1.5   | < LOQ | < LOQ |
| PCB 138                 | µg/Kg       | 2.2   | < LOQ | < LOQ |
| PCB 149                 | µg/Kg       | 1.9   | < LOQ | < LOQ |
| PCB 153                 | µg/Kg       | < LOQ | < LOQ | < LOQ |
| PCB 160                 | µg/Kg       | 3.9   | < LOQ | < LOQ |
| Hydrocarbons C >10      | mg/Kg       | 116.5 | 9.9   | 6.6   |
| Hydrocarbons C < 10     | µg/Kg       | 12.6  | 17.9  | < LOQ |
| Parameter               | U.O.M. d.w. | LH    | IP    | MPA   |
| IPA tot                 | µg/Kg       | 577.2 | 10.1  | 2.9   |
| Acenaphtene             | µg/Kg       | < LOQ | 1.0   | 0.9   |
| Acenaphthylene          | µg/Kg       | 4.1   | < LOQ | < LOQ |
| Anthracene              | µg/Kg       | 3.9   | < LOQ | < LOQ |
| Benzo[a]anthracene      | µg/Kg       | 40.4  | 0.5   | < LOQ |
| Benzo[a]pyrene          | µg/Kg       | 51.2  | < LOQ | < LOQ |
| Benzo[b]fluoranthene    | µg/Kg       | 120.4 | 1.2   | < LOQ |
| Benzo[ghi]perylene      | µg/Kg       | 53.2  | 0.6   | < LOQ |

---

|                         |       |       |       |       |
|-------------------------|-------|-------|-------|-------|
| Benzo[k]fluoranthene    | µg/Kg | 43.4  | 0.5   | < LOQ |
| Chrysene                | µg/Kg | 45.8  | < LOQ | < LOQ |
| Dibenz[a,h]anthracene   | µg/Kg | 34.5  | 0.8   | < LOQ |
| Fluoranthene            | µg/Kg | 55.9  | 0.7   | < LOQ |
| Fluorene                | µg/Kg | < LOQ | 1.2   | 0.7   |
| Indeno[1,2,3-c,d]pyrene | µg/Kg | 81.2  | 1.1   | < LOQ |
