# Supplementary material for: The Culturable Mycobiota of Sediments and Associated Microplastics: From a Harbor to a Marine Protected Area, a Comparative Study
Source: MDPI journal article supplement (doi:10.3390/jof8090927), 2022-08-31
Supplement: s1 [file s1]

**Table S2.** Trace elements in sediments of Livorno harbour (LH), intermediate point (IP) and marine protected area (MPA), respectively.

| Parameter | U.O.M. d.w.* | LH     | IP     | MPA    | LOQ*  |
|-----------|--------------|--------|--------|--------|-------|
| Al        | %            | 1.52   | 0.22   | 0.10   | 0.03  |
| As        | mg/Kg        | 6.27   | 2.86   | 30.55  | 1.00  |
| Cd        | mg/Kg        | 0.06   | < LOQ  | 0.03   | 0.02  |
| Ba        | mg/Kg        | 361.45 | 4.62   | 3.93   | 1.00  |
| Co        | mg/Kg        | 7.52   | < LOQ  | 1.62   | 1.00  |
| Cr        | mg/Kg        | 61.84  | 10.33  | 5.64   | 1.00  |
| Cu        | mg/Kg        | 48.86  | 1.88   | 2.55   | 1.00  |
| Fe        | %            | 1.94   | 0.37   | 0.38   | 0.03  |
| Mg        | %            | 1.02   | 0.30   | 1.21   | 0.03  |
| Mn        | mg/Kg        | 424.44 | 168.62 | 456.82 | 1.00  |
| Ni        | mg/Kg        | 42.77  | 8.43   | 2.11   | 1.00  |
| P         | mg/Kg        | 562.45 | 85.30  | 175.31 | 5.00  |
| Pb        | mg/Kg        | 15.54  | 2.74   | 8.81   | 1.00  |
| V         | mg/Kg        | 33.23  | 6.91   | 22.44  | 1.00  |
| Zn        | mg/Kg        | 248.50 | 11.06  | 12.33  | 1.00  |
| Hg        | mg/Kg        | 0.10   | 0.01   | 0.01   | 0.005 |

\* U.O.M. = unit of measure, LOQ= limit of quantifications
