# Supplementary material for: The Culturable Mycobiota of Sediments and Associated Microplastics: From a Harbor to a Marine Protected Area, a Comparative Study
Source: MDPI journal article supplement (doi:10.3390/jof8090927), 2022-08-31
Supplement: s1 [file s1]

**Table S6.** Fungal taxa from Livorno harbour (LH), intermediate point (IP) and Marine Protected Area (MPA), isolated from solid sediment (SS) and watery sediment (WS). Relative abundance (RA%) are reported. Common taxa of both matrices are in bold.

| Taxa                                                                                    | LH    |      | IP   |      | MPA  |      |
|-----------------------------------------------------------------------------------------|-------|------|------|------|------|------|
|                                                                                         | SS    | WS   | SS   | WS   | SS   | WS   |
| <i>Acremonium antarcticum</i> (Spegazzini) D. Hawksworth                                |       |      | 0.23 |      |      |      |
| <i>Acremonium pilosum</i> Giraldo, Guarro, Cano & Gene                                  | 0.29  |      | 2.04 |      |      |      |
| <i>Acremonium sclerotigenum</i> (Moreau & R. Moreau ex Valenta) W. Gams                 | 0.15  |      |      |      |      |      |
| <i>Acremonium tubakii</i> W. Gams                                                       | 0.44  |      | 0.23 |      |      |      |
| <b><i>Acrostalagmus luteoalbus</i> (Link) Zare, W. Gams &amp; Schroers</b>              | 10.40 | 0.73 | 1.13 |      | 0.90 |      |
| <i>Albifimbria verrucaria</i> (Alb. & Schwein.) L. Lombard & Crous                      |       |      |      |      |      | 0.18 |
| <b><i>Alternaria alternata</i> (Fr.) Keissl.</b>                                        | 0.73  |      |      | 0.26 |      | 0.06 |
| <i>Alternaria</i> sp.                                                                   |       |      |      | 0.01 |      |      |
| <i>Amesia nigricolor</i> (L.M. Ames) X. Wei Wang & Samson                               | 1.46  |      |      |      |      |      |
| <i>Annulohypoxylon multiforme</i> (Fr.) Y.M. Ju, J.D. Rogers & H.M. Hsieh               | 0.29  |      |      |      |      |      |
| <i>Apiospora arundinis</i> (Corda) Pintos & P. Alvarado                                 |       | 0.07 |      |      |      |      |
| <i>Apiospora marii</i> (Larrondo & Calvo) Pintos & P. Alvarado                          |       | 0.07 |      |      |      | 0.06 |
| <i>Apiospora stipae</i> Crous & R.K. Schumach.                                          |       |      | 0.11 |      |      |      |
| <i>Apiotrichum dulcitum</i> (Berkhout) Yurkov & Boekhout                                |       |      |      | 0.26 |      |      |
| <i>Apiotrichum laibachii</i> (Windisch) Yurkov & Boekhout                               |       |      |      | 0.68 |      |      |
| <i>Armillaria mellea</i> (Vahl) P. Kumm.                                                |       |      |      |      | 0.90 |      |
| <i>Arthopyrenia salicis</i> A. Massal.                                                  |       |      | 0.11 |      |      |      |
| <i>Arthrimum arundinis</i> (Corda) Dyko & B. Sutton                                     |       |      | 0.23 |      | 0.90 |      |
| <i>Arthrimum kogelbergense</i> Crous                                                    |       |      |      | 0.26 |      |      |
| <i>Arthrimum marii</i> Larrondo & Calvo                                                 |       |      | 0.23 |      | 1.35 |      |
| <b><i>Arthrimum phaeospermum</i> (Corda) M.B. Ellis</b>                                 |       |      | 0.23 | 0.09 |      | 0.53 |
| <i>Ascochyta</i> sp.                                                                    |       |      |      |      |      | 0.06 |
| <i>Ascomycota</i> sp.1                                                                  | 0.12  |      |      |      |      |      |
| <i>Ascomycota</i> sp.2                                                                  | 0.12  |      |      |      |      |      |
| <i>Ascomycota</i> sp.3                                                                  | 0.12  |      |      |      |      |      |
| <i>Ascomycota</i> sp.4                                                                  | 0.12  |      |      |      |      |      |
| <i>Ascomycota</i> sp.5                                                                  | 0.30  |      |      |      |      |      |
| <i>Aspergillus aureolatus</i> Munt.-Cvetk. & Bata                                       | 0.15  |      |      |      |      |      |
| <i>Aspergillus europaeus</i> Hubka, A. Nováková, Samson, Houbraken, Frisvad, M. Kolařík |       |      |      | 0.09 |      |      |
| <i>Aspergillus flavipes</i> (Bainier & Sartory) Thom & Church                           | 0.15  |      |      |      |      |      |
| <i>Aspergillus fumigatus</i> Fresen.                                                    | 1.02  |      | 0.34 |      |      |      |
| <i>Aspergillus germanicus</i> Frisvad, Varga & Samson                                   |       |      | 0.23 |      |      |      |
| <b><i>Aspergillus heyangensis</i> Z.T. Qi, Z.M. Sun &amp; Yu X. Wang</b>                | 0.59  | 0.13 | 0.68 |      | 0.45 | 0.29 |
| <b><i>Aspergillus insuetus</i> (Bainier) Thom &amp; Church</b>                          | 0.29  |      |      | 0.09 |      |      |
| <i>Aspergillus jensenii</i> Jurjević, S.W. Peterson & B.W. Horn                         |       |      | 0.11 |      |      |      |
| <i>Aspergillus niger</i> Tiegh.                                                         |       |      | 0.11 |      | 1.80 |      |
| <i>Aspergillus pseudodeflectus</i> Samson & Mouch.                                      | 0.44  |      |      |      |      |      |
| <i>Aspergillus pseudoglaucus</i> Blochwitz                                              | 0.73  |      |      |      |      |      |
| <i>Aspergillus</i> sp.                                                                  |       |      | 0.11 |      |      |      |
| <i>Aspergillus spelaus</i> A. Nováková, Hubka, M. Kolařík & S.W. Peterson               |       |      |      | 0.09 |      |      |

|                                                                                       |      |      |      |      |           |
|---------------------------------------------------------------------------------------|------|------|------|------|-----------|
| <i>Aspergillus tabacinus</i> Nakaz., Y. Takeda, Simo & A. Watan.                      | 0.73 |      |      |      |           |
| <i>Aspergillus templicola</i> Visagie, Hirooka & Samson                               | 0.29 |      |      |      |           |
| <i>Aspergillus terreus</i> Thom                                                       | 3.37 | 0.11 |      |      |           |
| <i>Aspergillus tubingensis</i> Mosseray                                               |      | 0.07 | 0.17 |      |           |
| <i>Aspergillus ustus</i> (Bainier) Thom & Church                                      | 0.15 |      |      | 0.45 |           |
| <i>Aspergillus versicolor</i> (Vuill.) Tirab.                                         | 0.59 |      |      |      |           |
| <b><i>Aureobasidium pullulans</i> (de Bary) G. Arnaud</b>                             |      | 0.86 | 0.11 | 0.85 | 1.35      |
| <i>Auxarthron conjugatum</i> (Kuehn) G.F. Orr & Kuehn                                 |      |      |      | 0.45 |           |
| <i>Auxarthron thaxteri</i> (Kuehn) G.F. Orr & Kuehn                                   | 0.15 |      |      |      |           |
| <i>Beauveria bassiana</i> (Bals.-Criv.) Vuill.                                        |      |      | 1.13 | 0.95 |           |
| <i>Beauveria brongniartii</i> (Sacc.) Petch                                           |      |      |      | 0.05 |           |
| <i>Beauveria felina</i> (DC.) J.W. Carmich.                                           | 1.61 |      |      |      |           |
| <i>Beauveria varroae</i> S.A. Rehner & R.A. Humber                                    |      |      | 0.11 |      |           |
| <i>Biatriospora</i> sp. (MUT 4883)                                                    |      |      |      | 0.90 |           |
| Bionectriaceae sp                                                                     |      |      | 0.23 |      |           |
| <i>Bjerkandera adusta</i> (Willd.) P. Karst.                                          |      |      |      | 0.90 |           |
| <i>Brunneomyces brunnescens</i> (W. Gams) Giraldo, Gene & Guarro                      |      |      | 1.70 | 1.67 |           |
| <i>Cadophora luteo-olivacea</i> (J.F.H. Beyma) T.C. Harr. & McNew                     |      |      | 0.11 |      |           |
| <i>Candida membranifaciens</i> (Lodder & Kreger) Wick. & K.A. Burton                  |      |      |      | 0.45 |           |
| <b><i>Candida norvegica</i> (Reiersöl) S.A. Mey. &amp; Yarrow</b>                     | 0.59 | 0.53 |      |      |           |
| <i>Candida pseudolambica</i> M.T. Sm. & Poot                                          | 0.59 |      | 0.34 | 0.59 |           |
| <i>Candida</i> sp.                                                                    | 0.15 |      |      |      |           |
| <i>Cephalotrichum asperulum</i> (J.E. Wright & S. Marchand) Sand.-Den., Guarro & Gené |      |      |      | 0.09 |           |
| <b><i>Cephalotrichum columnare</i> (H.J. Swart) S.P. Abbott</b>                       |      |      | 0.11 | 0.26 |           |
| <i>Cephalotrichum gorgonifer</i> (Bainier) Sand.-Den., Gené & Guarro                  | 0.15 |      |      |      |           |
| <i>Cephalotrichum inflatum</i> Y.L. Jiang & T.Y. Zhang                                |      | 0.20 |      |      |           |
| <i>Cephalotrichum stemonitis</i> (Pers.) Nees                                         |      |      | 0.45 |      |           |
| <i>Chaetomium cochliodes</i> Palliser                                                 |      |      |      | 0.17 |           |
| <i>Chaetomium globosum</i> Kunze                                                      |      |      | 0.57 |      |           |
| <i>Chrysosporium lobatum</i> Scharapov                                                |      |      |      | 0.45 |           |
| <i>Cistella</i> sp.                                                                   |      |      | 0.11 |      |           |
| <b><i>Cladosporium aggregatocaticratum</i> Bensch, Crous &amp; U. Braun</b>           |      |      | 0.45 | 0.45 | 0.06      |
| <b><i>Cladosporium allicinum</i> (Fr.) Bensch, U. Braun &amp; Crous</b>               | 0.44 | 0.07 | 1.25 | 2.25 |           |
| <i>Cladosporium asperulatum</i> Bensch, Crous & U. Braun                              | 0.73 |      | 0.23 | 0.45 |           |
| <b><i>Cladosporium cladosporioides</i> (Fresen.) G.A. de Vries</b>                    | 0.88 | 0.33 |      | 0.68 | 0.90 1.12 |
| <b><i>Cladosporium halotolerans</i> Zalar, de Hoog &amp; Gunde-Cim.</b>               |      | 0.59 | 0.34 | 0.68 | 24.28     |
| <i>Cladosporium inversicolor</i> Bensch, Crous & U. Braun                             |      |      |      |      | 0.12      |
| <b><i>Cladosporium limoniforme</i> Bensch, Crous &amp; U. Braun</b>                   | 0.44 |      | 0.68 | 0.60 | 0.47      |
| <b><i>Cladosporium perangustum</i> Bensch, Crous &amp; U. Braun</b>                   | 0.15 | 0.07 | 0.11 | 0.17 | 4.96      |
| <b><i>Cladosporium pseudocladosporioides</i> Bensch, Crous &amp; U. Braun</b>         |      |      | 1.93 | 0.85 | 4.10 0.71 |
| <b><i>Cladosporium psychrotolerans</i> Zalar, de Hoog &amp; Gunde-Cim.</b>            |      | 0.07 | 0.11 |      | 1.80 0.06 |
| <i>Cladosporium ramotenellum</i> K. Schub., Zalar, Crous & U. Braun                   |      | 0.33 |      | 0.17 | 8.19      |
| <i>Cladosporium</i> sp.2                                                              |      |      | 1.02 |      |           |
| <i>Cladosporium</i> sp.1                                                              |      |      | 1.02 | 5.82 |           |
| <i>Cladosporium sphaerospermum</i> Penz                                               |      | 0.07 |      |      |           |

|                                                                                                     |      |      |           |
|-----------------------------------------------------------------------------------------------------|------|------|-----------|
| <i>Cladosporium tenellum</i> K. Schub., Zalar, Crous & U. Braun                                     | 0.26 |      |           |
| <i>Cladosporium velox</i> Zalar, de Hoog & Gunde-Cim.                                               | 0.34 |      |           |
| <i>Cladosporium westerdijkiae</i> Bensch & Samson                                                   |      |      | 0.12      |
| <i>Cladosporium xylophilum</i> Bensch, Shabunin, Crous & U. Braun                                   | 0.13 |      |           |
| <b><i>Clonostachys rosea</i> (Link) Schroers, Samuels, Seifert &amp; W. Gams</b>                    | 0.79 | 0.43 | 0.12      |
| <i>Clonostachys rossmaniae</i> Schroers                                                             | 0.23 |      |           |
| <i>Clonostachys</i> sp.                                                                             | 0.11 |      |           |
| <i>Coniochaeta</i> sp.                                                                              | 0.11 |      |           |
| <i>Cyberlindnera saturnus</i> (Klöcker) Minter                                                      | 0.15 |      |           |
| <b><i>Debaryomyces hansenii</i> (Zopf) Lodder &amp; Kreger</b>                                      | 0.20 |      | 0.34 0.45 |
| <i>Debaryomyces marasmius</i> Di Menna                                                              | 0.23 |      |           |
| <i>Diaporthe columnaris</i> (D.F. Farr & Castl.) Udayanga & Castl.                                  | 0.11 |      |           |
| <i>Dichotomopilus funicola</i> (Cooke) X. Wei Wang & Samson                                         | 0.44 | 1.81 | 0.95      |
| <i>Discula destructiva</i> Redlin                                                                   | 0.44 |      |           |
| <i>Doratomyces microsporus</i> (Sacc.) F.J. Morton & G. Sm.                                         |      |      | 0.06      |
| <i>Emericella pluriseminata</i> Stchigel & Guarro                                                   | 0.29 |      |           |
| <i>Emericellopsis maritima</i> Beliakova                                                            |      | 0.11 |           |
| <i>Emericellopsis minima</i> Stolk                                                                  | 0.59 |      |           |
| <i>Epicoccum nigrum</i> Link                                                                        |      |      | 0.45      |
| <i>Eupenicillium crustaceum</i> F. Ludw.                                                            | 0.59 | 0.68 | 0.54      |
| <i>Exophiala equina</i> (Pollacci) de Hoog, Vicente, Najafzadeh, Harrak, Badali & Seyedmousavi      |      | 0.11 |           |
| <i>Exophiala pisciphila</i> McGinnis & Ajello                                                       | 0.15 | 0.11 |           |
| <i>Exophiala xenobiotica</i> de Hoog, J.S. Zeng, Harrak & Deanna A. Sutton                          |      |      |           |
| <i>Filobasidium magnum</i> (Lodder & Kreger-van Rij) Xin Zhan Liu, F.Y. Bai, M. Groenew. & Boekhout | 0.26 |      |           |
| <i>Furcasterigmium furcatum</i> (Gams) Giraldo López & Crous                                        |      | 0.11 |           |
| <i>Fusarium brachygibbosum</i> Padwick                                                              |      | 0.11 |           |
| <i>Fusarium cerealis</i> (Cooke) Sacc.                                                              |      |      | 1.03      |
| <i>Fusarium incarnatum/equiseti</i> sp. complex                                                     |      | 2.91 | 0.59      |
| <i>Fusarium cortaderiae</i> O'Donnell, T. Aoki, Kistler & Geiser                                    |      | 0.23 |           |
| <b><i>Fusarium culmorum</i> (Wm.G. Sm.) Sacc.</b>                                                   | 0.33 | 0.11 | 1.79      |
| <i>Fusarium equiseti</i> (Corda) Sacc.                                                              |      |      | 0.17      |
| <i>Fusarium flocciferum</i> Corda                                                                   |      |      | 0.26      |
| <i>Fusarium incarnatum</i> (Roberge ex Desm.) Sacc.                                                 |      | 0.34 | 0.18      |
| <b><i>Fusarium oxysporum</i> Schltdl.</b>                                                           | 0.20 | 0.11 |           |
| <i>Geotrichum candidum</i> Link                                                                     | 0.07 |      | 0.17      |
| <b><i>Gibbellulopsis nigrescens</i> (Pethybr.) Zare, W. Gams &amp; Summerb.</b>                     |      | 0.45 | 0.07      |
| <i>Gliomastix murorum</i> (Corda) S. Hughes                                                         |      | 0.23 | 4.15      |
| <i>Halosphaeriaceae</i> sp.                                                                         |      |      | 0.45      |
| <i>Hongkongmyces thailandica</i> Phukhams. & K.D. Hyde                                              | 0.15 | 0.57 |           |
| <i>Hypocreales</i> sp.                                                                              |      |      | 0.05      |
| <i>Kiflimonium curvulum</i> (W. Gams) Summerb., J.A. Scott, Guarro & Crous                          |      | 0.11 |           |
| <i>Lasionectria marigotensis</i> Lechat & J. Fourn.                                                 |      | 0.23 |           |
| <i>Lecanicillium fusisporum</i> (W. Gams) Zare & W. Gams                                            |      |      | 0.45      |
| <i>Lentitheciaceae</i> sp.                                                                          |      | 0.11 |           |

|                                                                                                                                                                  |      |      |      |           |      |  |           |
|------------------------------------------------------------------------------------------------------------------------------------------------------------------|------|------|------|-----------|------|--|-----------|
| <i>Malbranchea circinata</i> Sigler & J.W. Carmich.                                                                                                              | 0.44 |      |      | 0.45      |      |  |           |
| <i>Marquandomyces marquandii</i> (Masee) Samson, Houbraken & Luangsa-ard                                                                                         |      |      |      |           |      |  | 0.71      |
| <i>Massarina rubi</i> (Fuckel) Sacc.                                                                                                                             |      |      |      |           |      |  | 2.71      |
| <i>Massarina</i> sp.1                                                                                                                                            |      |      |      | 1.13      |      |  |           |
| <i>Massarina</i> sp.2                                                                                                                                            | 0.12 |      |      |           |      |  |           |
| <i>Massarina</i> sp.3                                                                                                                                            | 0.30 |      |      |           |      |  |           |
| <i>Metarhizium brunneum</i> Petch                                                                                                                                |      |      |      | 0.11      |      |  |           |
| <i>Microascus paisii</i> (Pollacci) Sand.-Den., Gené & Guarro                                                                                                    | 1.32 |      |      | 0.11      |      |  |           |
| <i>Microascus</i> sp.                                                                                                                                            |      |      |      |           |      |  | 0.45      |
| <i>Microdiplodia</i> sp.                                                                                                                                         |      |      |      |           |      |  | 1.80      |
| <i>Microdochium seminicola</i> M. Hern.-Restr., Seifert, Clear & B. Dorn                                                                                         |      |      |      | 0.11      |      |  |           |
| <i>Mortierella alpina</i> Peyronel                                                                                                                               | 0.40 |      |      | 2.14      |      |  |           |
| <i>Mucor circinelloides</i> Tiegh.                                                                                                                               | 0.07 |      |      |           |      |  |           |
| <i>Mucor heterogamus</i> Vuill.                                                                                                                                  | 0.26 |      |      |           |      |  |           |
| <i>Mucor hiemalis</i> Wehmer                                                                                                                                     |      |      |      | 1.20      |      |  |           |
| <i>Mucor plumbeus</i> Bonord.                                                                                                                                    |      |      |      | 1.11      |      |  | 0.06      |
| <i>Myrmecridium phragmitis</i> Crous                                                                                                                             |      |      |      | 0.23      |      |  |           |
| <i>Myrmecridium schulzeri</i> (Sacc.) Arzanlou, W. Gams & Crous                                                                                                  |      |      |      | 0.11      |      |  |           |
| <i>Myrothecium</i> sp.                                                                                                                                           |      |      |      |           |      |  | 0.90      |
| <i>Nectria inventa</i> Pethybr.                                                                                                                                  |      |      |      | 0.11      |      |  |           |
| <i>Nectria pseudotrichia</i> Berk. & M.A. Curtis                                                                                                                 |      |      |      |           |      |  | 0.06      |
| <i>Neocosmospora solani</i> (Mart.) L. Lombard & Crous                                                                                                           | 0.15 |      |      | 0.68      |      |  |           |
| <i>Neopestalotiopsis clavispora</i> (G.F. Atk.) Maharachch., K.D. Hyde & Crous                                                                                   |      |      |      |           |      |  | 0.26      |
| <i>Niesslia tenuis</i> (W. Gams) W. Gams                                                                                                                         |      |      |      | 25.03     |      |  |           |
| <i>Nothophoma quercina</i> (Syd. & P. Syd.) Qian Chen & L. Cai                                                                                                   |      |      |      | 0.13      |      |  |           |
| <i>Papiliotrema laurentii</i> (Kuff.) Xin Zhan Liu, F.Y. Bai, M. Groenew. & Boekhout                                                                             |      |      |      |           |      |  | 0.34      |
| <i>Paraconiothyrium cyclothyrioides</i> Verkley                                                                                                                  |      |      |      |           |      |  | 0.05      |
| <i>Parasacrocladium debuynii</i> L. Lombard                                                                                                                      | 0.44 |      |      |           |      |  |           |
| <i>Parasacrocladium radiatum</i> (Sukapure & Thirum.) Summerb., J.A. Scott, Guarro & Crous                                                                       | 1.61 |      |      | 0.11      |      |  |           |
| <i>Parasacrocladium wereldwijnianum</i> Hern.-Restr.                                                                                                             | 0.59 |      |      | 0.34      |      |  |           |
| <i>Parathielavia kuwaitensis</i> (Moustafa) X. Wei Wang & Houbraken                                                                                              |      |      |      | 0.91      |      |  |           |
| <i>Parathyridaria flabelliae</i> E. Bovio, A. Poli, Prigione & Varese                                                                                            |      |      |      | 0.11      |      |  |           |
| <i>Parengyodontium album</i> (Limber) C.C. Tsang, J.F.W. Chan, W.M. Pong, J.H.K. Chen, A.H.Y. Ngan, M. Cheung, C.K.C. Lai, D.N.C. Tsang, S.K.P. Lau & P.C.Y. Woo | 0.40 |      |      |           |      |  |           |
| <i>Penicillium jacksonii</i> K.G. Rivera, Houbraken & Seifert                                                                                                    |      |      |      |           |      |  | 1.03      |
| <i>Penicillium antarcticum</i> A.D. Hocking & C.F. McRae                                                                                                         | 0.29 |      |      |           |      |  | 0.90 0.06 |
| <i>Penicillium atramentosum</i> Thom                                                                                                                             | 0.29 | 0.20 |      | 1.20      |      |  |           |
| <i>Penicillium brevicompactum</i> Dierckx                                                                                                                        |      | 0.13 | 0.79 | 2.56 3.16 |      |  | 0.18      |
| <i>Penicillium canescens</i> Sopp                                                                                                                                |      |      |      | 3.85      |      |  | 0.06      |
| <i>Penicillium canis</i> S.W. Peterson                                                                                                                           | 0.15 |      |      |           |      |  |           |
| <i>Penicillium chrysogenum</i> Thom                                                                                                                              |      |      |      | 20.05     | 0.09 |  |           |
| <i>Penicillium cinereoatrum</i> Chalab.                                                                                                                          |      |      |      |           |      |  | 0.90      |
| <i>Penicillium citreonigrum</i> Dierckx                                                                                                                          |      |      |      | 0.23      |      |  |           |
| <i>Penicillium coprophilum</i> (Berk. & M.A. Curtis) Seifert & Samson                                                                                            |      |      |      | 0.34      |      |  |           |
| <i>Penicillium coralligerum</i> Nicot & Pionnat                                                                                                                  |      |      |      |           |      |  | 0.09      |

|                                                                   |       |      |           |           |
|-------------------------------------------------------------------|-------|------|-----------|-----------|
| <i>Penicillium crustosum</i> Thom                                 | 0.59  | 0.59 | 1.03      | 38.48     |
| <i>Penicillium cyclopium</i> Westling                             | 0.86  |      |           |           |
| <i>Penicillium daleae</i> K.W. Zaleski                            | 0.79  | 0.60 |           |           |
| <b><i>Penicillium echinulatum</i> Raper &amp; Thom ex Fassat.</b> | 5.55  | 0.23 | 0.09 0.90 | 0.94      |
| <i>Penicillium egyptiacum</i> J.F.H. Beyma                        |       | 2.39 | 0.12      |           |
| <i>Penicillium expansum</i> Link                                  | 0.13  | 1.11 | 0.65      |           |
| <i>Penicillium fellutanum</i> Biourge                             | 2.34  | 0.11 |           |           |
| <i>Penicillium freii</i> Frisvad & Samson                         |       |      | 0.12      |           |
| <b><i>Penicillium glabrum</i> (Wehmer) Westling</b>               | 0.88  | 0.07 | 0.34      | 2.48 0.53 |
| <i>Penicillium glandicola</i> (Oudem.) Seifert & Samson           | 0.73  | 18.8 | 9         |           |
| <i>Penicillium griseofulvum</i> Dierckx                           | 0.59  | 2.56 | 0.24      |           |
| <i>Penicillium canescens</i> Sopp                                 | 0.13  |      |           |           |
| <i>Penicillium herquei</i> Bainier & Sartory                      |       |      | 0.12      |           |
| <i>Penicillium hoeksii</i> Houbraken                              | 2.44  | 0.43 | 0.06      |           |
| <i>Penicillium hordei</i> Stolk                                   |       | 6.92 | 0.29      |           |
| <i>Penicillium jacksonii</i> K.G. Rivera, Houbraken & Seifert     | 0.07  |      | 0.06      |           |
| <i>Penicillium janczewskii</i> K.W. Zaleski                       | 2.64  | 0.34 | 2.25      |           |
| <i>Penicillium javanicum</i> J.F.H. Beyma                         | 0.59  |      |           |           |
| <i>Penicillium manginii</i> Duché & R. Heim                       |       |      | 11.96     |           |
| <i>Penicillium melanoconidium</i> (Frisvad) Frisvad & Samson      | 0.66  |      |           |           |
| <i>Penicillium menonorum</i> S.W. Peterson                        | 0.15  |      |           |           |
| <i>Penicillium murcianum</i> C. Ramírez & A.T. Martínez           | 1.46  | 0.91 | 4.10      |           |
| <i>Penicillium nalgiovense</i> Laxa                               |       | 0.09 |           |           |
| <i>Penicillium olsonii</i> Bainier & Sartory                      |       | 0.26 | 0.06      |           |
| <i>Penicillium osmophilum</i> Stolk & Veenb.-Rijks                | 45.18 |      |           |           |
| <i>Penicillium oxalicum</i> Currie & Thom                         | 1.17  | 0.23 |           |           |
| <i>Penicillium pancosmium</i> Houbraken, Frisvad & Samson         |       |      | 0.06      |           |
| <i>Penicillium paneum</i> Frisvad                                 | 0.29  |      |           |           |
| <i>Penicillium parvulum</i> S.W. Peterson & B.W. Horn             | 0.59  |      |           |           |
| <i>Penicillium restrictum</i> J.C. Gilman & E.V. Abbott           | 0.15  | 0.11 | 2.25      |           |
| <i>Penicillium roseopurpureum</i> Dierckx                         |       | 0.91 |           |           |
| <i>Penicillium sacculum</i> E. Dale                               |       | 1.25 |           |           |
| <i>Penicillium scabrosum</i> Frisvad, Samson & Stolk              |       | 0.09 |           |           |
| <b><i>Penicillium simplicissimum</i> (Oudem.) Thom</b>            | 8.93  | 0.01 |           |           |
| <b><i>Penicillium sizovae</i> Baghd.</b>                          |       | 1.81 | 0.17 2.71 |           |
| <b><i>Penicillium solitum</i> Westling</b>                        |       | 0.07 | 0.05      |           |
| <i>Penicillium</i> sp1                                            | 0.15  |      |           |           |
| <i>Penicillium</i> sp2                                            |       | 0.34 |           |           |
| <i>Penicillium spathulatum</i> Frisvad & Samson                   |       |      | 0.06      |           |
| <i>Penicillium steckii</i> K.W. Zaleski                           |       |      | 0.06      |           |
| <i>Penicillium yezoense</i> Hanzawa                               |       |      | 0.18      |           |
| <i>Penicillium ubiquetum</i> Houbraken, Frisvad & Samson          |       | 0.17 | 0.12      |           |
| <i>Penicillium vancouverense</i> Houbraken, Frisvad & Samson      |       |      | 0.06      |           |
| <i>Penicillium venetum</i> (Frisvad) Frisvad                      | 0.07  | 0.60 |           |           |

|                                                                                                       |       |           |      |
|-------------------------------------------------------------------------------------------------------|-------|-----------|------|
| <i>Penicillium viridicatum</i> Westling                                                               | 0.07  | 0.94      | 0.18 |
| <i>Penicillium waksmanii</i> K.W. Zaleski                                                             | 0.23  |           |      |
| <b><i>Penicillium yarmokense</i> Baghd.</b>                                                           | 0.07  | 0.09      | 0.90 |
| <i>Periconia byssoides</i> Pers.                                                                      |       | 0.45      |      |
| <i>Phaeosphaeria</i> sp.                                                                              |       | 0.45      |      |
| <i>Phaeosphaeriaceae</i> sp.                                                                          | 0.15  |           |      |
| <i>Pholiota gummosa</i> (Lasch) Singer                                                                | 0.15  |           |      |
| <i>Phoma leveillei</i> Boerema & G.J. Bollen                                                          |       | 0.91      |      |
| <i>Pichia methanolica</i> Makig.                                                                      |       | 0.11      |      |
| <i>Pichia occidentalis</i> (Kurtzman, M.J. Smiley & C.J. Johnson) Kurtzman, Robnett & Basehoar-Powers | 0.44  |           |      |
| <i>Plectosphaerella cucumerina</i> (Lindf.) W. Gams                                                   |       | 0.79      |      |
| Pleosporales sp.1 (C34)                                                                               | 0.15  |           |      |
| Pleosporales sp.2(c46)                                                                                | 0.07  |           |      |
| <i>Preussia</i> sp.                                                                                   | 0.15  |           |      |
| <i>Priceomyces carsonii</i> (Phaff & E.P. Knapp) M. Suzuki                                            |       | 0.23      |      |
| <i>Pseudeurotium bakeri</i> C. Booth                                                                  | 0.15  |           |      |
| <i>Pseudeurotium ovale</i> Stolk                                                                      | 0.29  | 0.11      | 0.05 |
| <i>Pseudogymnoascus pannorum</i> (Link) Minnis & D.L. Lindner                                         |       |           | 0.06 |
| <i>Purpureocillium lilacinum</i> (Thom) Luangsa-ard, Houbraken, Hywel-Jones & Samson                  |       | 2.38      | 5.41 |
| <i>Pyrenochaetopsis tabarestanensis</i> M. Papizadeh, Soudi, Amini, Wijayaw. & K.D. Hyde              | 0.15  |           |      |
| <i>Rhizopus oryzae</i> Went & Prins. Geerl.                                                           | 0.26  | 0.26      |      |
| <i>Rhodotorula diobovata</i> (S.Y. Newell & I.L. Hunter) Q.M. Wang, F.Y. Bai, M. Groenew. & Boekhout  | 23.84 | 21.7<br>1 | 0.53 |
| <i>Rhodotorula mucilaginosa</i> (A. Jörg.) F.C. Harrison                                              | 1.19  |           | 0.12 |
| <i>Rhodotorula sphaerocarpa</i> (S.Y. Newell & Fell) Q.M. Wang, F.Y. Bai, M. Groenew. & Boekhout      | 0.07  |           |      |
| <i>Roussoella</i> sp.                                                                                 |       | 0.23      | 2.25 |
| <i>Roussoellaceae</i> sp.                                                                             |       |           | 0.45 |
| <i>Sarocladium kiliense</i> (Grütz) Summerbell                                                        | 0.29  |           |      |
| <i>Scedosporium dehoogii</i> Gilgado, Cano, Gené & Guarro                                             | 2.00  | 0.79      |      |
| <i>Scytalidium lignicola</i> Pesante                                                                  |       | 0.11      |      |
| <i>Solicoccozyma aerea</i> (Saito) Yurkov                                                             |       | 0.09      | 0.06 |
| <i>Sordariomycetes</i> sp.                                                                            |       |           | 0.45 |
| <i>Sporothrix inflata</i> de Hoog                                                                     | 1.02  |           |      |
| <i>Sporothrix nigrograna</i> (Masuya) Z.W. de Beer, T.A. Duong & M.J. Wingf.                          | 0.15  |           |      |
| <i>Stachybotryna excentrica</i> Gené, M. Calduch, Abdullah & Guarro                                   |       | 0.11      | 0.90 |
| <b><i>Stachybotrys chartarum</i> (Ehrenb.) S. Hughes</b>                                              | 0.15  |           | 0.12 |
| <i>Stachybotrys chlorohalonata</i> B. Andersen & Thrane                                               | 6.73  | 0.34      | 0.45 |
| <i>Stachylidium bicolor</i> Link                                                                      | 0.29  | 0.11      |      |
| <i>Stagonosporopsis cucurbitacearum</i> (Fr.) Aveskamp, Gruyter & Verkley                             | 0.40  |           |      |
| <i>Stilbella fimetaria</i> (Pers.) Lindau                                                             |       | 0.11      |      |
| <i>Stilbella</i> sp.                                                                                  |       |           | 0.45 |
| <i>Suhomyces ambrosiae</i> (Kurtzman) M. Blackw. & Kurtzman                                           |       |           | 0.06 |
| <i>Suhomyces</i> sp.                                                                                  |       |           | 0.06 |

|                                                                                                            |       |      |      |      |      |      |      |
|------------------------------------------------------------------------------------------------------------|-------|------|------|------|------|------|------|
| <i>Symmetrospora coprosmae</i> (Hamamoto & Nakase) Q.M. Wang, F.Y. Bai, M. Groenew. & Boekhout             | 0.15  | 0.34 |      |      |      |      |      |
| <i>Talaromyces albobiverticillius</i> (H.M. Hsieh, Y.M. Ju & S.Y. Hsieh) Samson, Yilmaz, Frisvad & Seifert |       |      |      |      |      |      | 0.45 |
| <i>Talaromyces allahbadensis</i> (B.S. Mehrotra & D. Kumar) Samson, N. Yilmaz & Frisvad                    |       |      |      |      |      | 0.11 |      |
| <i>Talaromyces argentinensis</i> Jurjević & S.W. Peterson                                                  |       |      |      |      |      |      | 0.45 |
| <i>Talaromyces borbonicus</i> Houbraken                                                                    |       |      |      |      |      |      | 1.35 |
| <i>Talaromyces catalonicus</i> Guevara-Suarez, Gené & Guarro                                               |       |      |      |      |      | 0.34 |      |
| <i>Talaromyces flavus</i> (Klöcker) Stolk & Samson                                                         |       |      |      |      |      | 0.23 |      |
| <i>Talaromyces minioluteus</i> (Dierckx) Samson, Yilmaz, Frisvad & Seifert                                 | 0.15  |      |      |      |      |      | 1.80 |
| <i>Talaromyces muroii</i> Yaguchi, Someya & Udagawa                                                        | 0.15  |      |      |      |      |      |      |
| <i>Talaromyces verruculosus</i> (Peyronel) Samson, Yilmaz, Frisvad & Seifert                               |       |      |      |      |      | 0.11 |      |
| <i>Talaromyces versatilis</i> P.F. Cannon, Bridge & Buddie                                                 | 0.15  |      |      | 0.68 |      |      | 0.45 |
| <i>Talaromyces wortmannii</i> (Klöcker) C.R. Benj.                                                         | 1.90  |      |      | 0.11 |      |      | 0.05 |
| <i>Thelebolus</i> sp. 1                                                                                    | 0.15  |      |      |      |      |      |      |
| <i>Thelebolus</i> sp. 2                                                                                    |       |      |      | 0.07 |      |      |      |
| <i>Thelonectria veuillotiana</i> (Sacc. & Roum.) P. Chaverri & C. Salgado                                  |       |      |      |      |      |      | 0.06 |
| <i>Tilachlidium brachiatum</i> (Batsch) Petch                                                              | 0.15  |      |      |      |      |      |      |
| <i>Tilletiopsis washingtonensis</i> Nyland                                                                 |       |      |      | 0.11 |      |      | 2.25 |
| <i>Trematosphaeria grisea</i> (J.E. Mackinnon, Ferrada & Montemart.) S.A. Ahmed, Sande, Fahal & de Hoog    | 1.90  |      |      |      |      |      |      |
| <i>Trichoderma afroharzianum</i> (Batsch) Petch                                                            |       |      |      |      |      | 0.68 |      |
| <i>Trichoderma alni</i> Jaklitsch                                                                          |       |      |      |      |      |      | 0.45 |
| <i>Trichoderma atrobrunneum</i> F.B. Rocha, P. Chaverri & Jaklitsch                                        |       |      |      |      |      | 0.09 |      |
| <i>Trichoderma atroviride</i> P. Karst.                                                                    |       | 2.84 | 0.57 | 0.94 |      |      | 0.59 |
| <i>Trichoderma caeruleascens</i> (Jaklitsch & Voglmayr) Jaklitsch & Voglmayr                               |       |      |      |      |      |      | 0.45 |
| <i>Trichoderma ceratophylli</i> Z.F. Yu & X. Du                                                            |       |      |      |      |      | 0.11 |      |
| <b><i>Trichoderma gamsii</i> Samuels &amp; Druzhin.</b>                                                    |       |      |      |      |      | 0.23 | 2.05 |
| <i>Trichoderma hamatum</i> (Bonord.) Bainier                                                               |       |      |      |      |      | 0.11 |      |
| <b><i>Trichoderma harzianum</i> Rifai</b>                                                                  | 24.01 | 4.23 | 3.28 | 7.01 | 2.39 |      | 5.54 |
| <i>Trichoderma koningiopsis</i> Samuels, C. Suárez & H.C. Evans                                            |       |      |      |      |      | 0.11 |      |
| <b><i>Trichoderma longibrachiatum</i> Rifai</b>                                                            |       | 1.65 |      | 0.11 |      |      |      |
| <i>Trichoderma orientale</i> (Samuels & Petrini) Jaklitsch & Samuels                                       |       | 0.20 |      |      |      | 0.17 |      |
| <i>Trichoderma paraviridescens</i> Jaklitsch, Samuels & Voglmayr                                           |       |      |      |      |      | 0.09 |      |
| <i>Trichoderma sinuosum</i> P. Chaverri & Samuels                                                          |       |      |      |      |      |      | 0.99 |
| <i>Trichoderma</i> sp. 1                                                                                   |       |      |      |      |      | 0.57 |      |
| <i>Trichoderma</i> sp. 2                                                                                   |       |      |      |      |      | 0.79 |      |
| <i>Trichoderma</i> sp. 3                                                                                   |       |      |      |      |      |      | 0.06 |
| <i>Trichoderma</i> sp.4                                                                                    |       |      |      |      |      |      | 0.06 |
| <i>Trichoderma tomentosum</i> Bissett                                                                      |       |      |      |      |      | 0.23 |      |
| <i>Trichoderma velutinum</i> Bissett, C.P. Kubicek & Szakacs                                               |       |      |      |      |      | 0.34 | 0.90 |
| <i>Trichoderma viridescens</i> (A.S. Horne & H.S. Will.) Jaklitsch & Samuels                               |       |      |      |      |      |      | 3.16 |
| <b><i>Trichosporiella flavificans</i> (Nakase) de Hoog, Rodr. Mir. &amp; Oorschot</b>                      | 0.13  | 0.06 |      |      |      |      |      |
| <i>Truncatella angustata</i> (Pers.) S. Hughes                                                             |       |      |      |      |      |      | 0.16 |
| <i>Ustilago</i> sp.                                                                                        | 0.13  |      |      |      |      |      |      |
| <i>Valsaria spartii</i> Maubl.                                                                             |       |      |      |      |      | 0.11 |      |

---

|                                                                                              |      |      |      |
|----------------------------------------------------------------------------------------------|------|------|------|
| <i>Vanrija albida</i> (C. Ramírez) M. Weiß                                                   | 0.10 |      |      |
| <i>Vishniacozyma heimaeyensis</i> Vishniac ex Xin Zhan Liu, F.Y. Bai, M. Groenew. & Boekhout | 0.20 |      |      |
| <i>Volutella ciliata</i> (Alb. & Schwein.) Fr.                                               | 0.91 |      |      |
| <i>Wardomyopsis humicola</i> (G.L. Barron) Udagawa & Furuya                                  | 0.59 | 1.02 | 5.41 |
| <i>Westerdykella centenaria</i> Crous, van Diepeningen & A.-C. Normand                       | 0.90 |      |      |
| <i>Westerdykella dispersa</i> (Clum) Cejp & Milko                                            | 0.88 |      |      |
