# Supplementary material for: The Culturable Mycobiota of Sediments and Associated Microplastics: From a Harbor to a Marine Protected Area, a Comparative Study
Source: J Fungi (Basel). 2022 Aug 31;8(9):927. doi: 10.3390/jof8090927 (PMC9501098; doi:10.3390/jof8090927)
Supplement: Supplementary file 1 [file jof-08-00927-s001.zip › Table S5.xlsx]

## Sheet: CFU
					Table S5: Fungal load, for watery sediment (WS) in term of CFU/ 100 ml-1 and for solid sediment in term of CFU/g-1 dwt, for each site and subsite;
		matrix	WS
		Sites	LH									IP									MPA
		Sub-sites	LH-A			LH-B			LH-C			IP-A			IP-B			IP-C			MPA-A			MPA-B			MPA-C
		media	MEA	CMA	SNA	MEA	CMA	SNA	MEA	CMA	SNA	MEA	CMA	SNA	MEA	CMA	SNA	MEA	CMA	SNA	MEA	CMA	SNA	MEA	CMA	SNA	MEA	CMA	SNA
		CFU/100mL	1710±643	1890±613	990±430	1770±394	2260±897	1280±198	2450±602	1656±701	1110±460	1740±295	1410±366	1010±328	1550±327	1250±291	1300±355	1340±283	878±294	860±157	193±41	182±34	222±50	177±28	169±45	201±57	199±27	180±39	174±42
		Avarage CFU/100ml	1512±845									1260±349									187±16
		matrix	SS
		Sites	LH									IP									MPA
		Sub-sites	LH-A			LH-B			LH-C			IP-A			IP-B			IP-C			MPA-A			MPA-B			MPA-C
		media	MEA	CMA	SNA	MEA	CMA	SNA	MEA	CMA	SNA	MEA	CMA	SNA	MEA	CMA	SNA	MEA	CMA	SNA	MEA	CMA	SNA	MEA	CMA	SNA	MEA	CMA	SNA
		CFU/gdw	7100±4650	7300±2260	7400±2070	6200±4180	7300±2160	5900±1850	9400±4220	8100±1450	9600±2670	880±820	490±280	620±450	1390±700	990±450	1700±770	890±190	1080±180	790±310	190±160	270±230	200±180	270±140	290±250	320±360	380±340	290±140	350±530
		Avarage CFU/gdw	7580±1260									980±370									280±60
